# Supplementary material
Source: PubMed Central journal article supplement (PMC5470500)
Supplement: PEDS_20162444SupplementaryData.pdf [file PEDS_20162444SupplementaryData.pdf]

## Supplemental Information

**SUPPLEMENTAL TABLE 5** ICD-9-CM Codes of MH and Physical Health Comorbidities

| Condition                                               | ICD-9-CM Code                                                  |
|---------------------------------------------------------|----------------------------------------------------------------|
| MH comorbidity                                          |                                                                |
| Depressive disorder                                     | 296.2, 296.3, 300.4, 311                                       |
| Conduct disorder/oppositional defiant disorder (CD/ODD) | 312.81, 312.82, 312.89, 313.81, 312.9                          |
| Anxiety disorder                                        | 300.0–300.3, 300.5–300.9                                       |
| Bipolar disorder                                        | 296.0–296.1, 296.4–296.9                                       |
| Schizophrenia/other psychotic disorder                  | 295, 297.0–297.3, 297.8–298.4, 298.8–298.9                     |
| Other MH disorder                                       | 291–294, 299, 301, 306–310, 312 excluding CD/ODD, 313, 315–316 |
| Physical health comorbidity                             |                                                                |
| Asthma                                                  | 493                                                            |
| Other chronic medical condition                         |                                                                |
| Cerebral palsy                                          | 343                                                            |
| Cystic fibrosis                                         | 277                                                            |
| Diabetes                                                | 250, 251                                                       |
| Spina bifida                                            | 741                                                            |
| Seizure disorder                                        | 345                                                            |
| Congenital heart disease                                | 745–747.49                                                     |
| Sickle cell disease                                     | 282.6                                                          |
| Malignant neoplasms                                     | 140–208                                                        |

**SUPPLEMENTAL TABLE 6** Regression Results Examining Racial/Ethnic Differences in Adequate Follow-up Care and Combined Treatment With Psychotherapy Services Among Medicaid-Enrolled Children Who Initiated ADHD Medication

|                                                | Adequate Follow-up Care       |                        |                                | Combined Treatment With Psychotherapy |                      |                                                          |                      |
|------------------------------------------------|-------------------------------|------------------------|--------------------------------|---------------------------------------|----------------------|----------------------------------------------------------|----------------------|
|                                                | Initiation Phase <sup>a</sup> | C&M Phase <sup>b</sup> | Any Therapy Visit <sup>b</sup> | ME (SE) <sup>d</sup>                  | ME (SE) <sup>d</sup> | No. Therapy Visits Conditional on Any Visit <sup>c</sup> | ME (SE) <sup>e</sup> |
| Race/ethnicity                                 |                               |                        |                                |                                       |                      |                                                          |                      |
| White                                          | (Ref)                         | (Ref)                  | (Ref)                          | (Ref)                                 | (Ref)                | (Ref)                                                    | (Ref)                |
| African American                               | -5.7***                       | -2.2**                 | (0.6)                          | 4.4***                                | (0.7)                | 0.1                                                      | (0.2)                |
| Hispanic                                       | 0.7                           | 4.5***                 | (0.7)                          | 3.8*                                  | (1.6)                | -0.2                                                     | (0.4)                |
| Other                                          | -1.7                          | 1.1                    | (1.5)                          | -1.7                                  | (2.3)                | 2.8*                                                     | (1.1)                |
| Unknown                                        | -1.5*                         | 1.4                    | (0.6)                          | 2.8***                                | (0.8)                | 0.2                                                      | (0.3)                |
| Demographics                                   |                               |                        |                                |                                       |                      |                                                          |                      |
| Age, y                                         | -0.6***                       | -0.3***                | (0.1)                          | 0.5***                                | (0.1)                | 0.2***                                                   | (0.04)               |
| Girl (versus boy)                              | 1.7***                        | 1.5***                 | (0.2)                          | 0.6                                   | (0.4)                | 0.3*                                                     | (0.1)                |
| Plan type                                      |                               |                        |                                |                                       |                      |                                                          |                      |
| Fee-for-service only                           | (Ref)                         | (Ref)                  | (Ref)                          | (Ref)                                 | (Ref)                | (Ref)                                                    | (Ref)                |
| Any behavioral health care carve-out plan      | 0.4                           | 0.2                    | (2.3)                          | -8.1*                                 | (3.7)                | -0.5                                                     | (0.5)                |
| Comprehensive managed care plan (no carve-out) | 7.9***                        | 10.2***                | (0.9)                          | 3.0**                                 | (1.1)                | 0.2                                                      | (0.3)                |
| Primary care case management (no carve-out)    | 7.7***                        | 8.6***                 | (1.1)                          | 8.3***                                | (1.5)                | 1.2**                                                    | (0.4)                |
| More than 1 type of plan                       | 4.9***                        | 6.1***                 | (0.9)                          | 2.5                                   | (1.3)                | 0.02                                                     | (0.3)                |
| Eligibility type                               |                               |                        |                                |                                       |                      |                                                          |                      |
| Blind/disabled                                 | 9.1***                        | 7.9***                 | (0.9)                          | 14.7***                               | (1.1)                | 4.4***                                                   | (0.3)                |
| Foster care                                    | 0.4                           | 1.7                    | (0.7)                          | 1.0                                   | (0.8)                | -0.4                                                     | (0.2)                |
| Other eligibility type                         |                               |                        |                                |                                       |                      |                                                          |                      |
| Physical health comorbidity                    |                               |                        |                                |                                       |                      |                                                          |                      |
| Asthma                                         | 5.7***                        | 6.9***                 | (0.3)                          | -0.2                                  | (0.5)                | -0.1                                                     | (0.2)                |
| Any other chronic condition                    | 3.2***                        | 2.9**                  | (0.7)                          | -4.3***                               | (0.9)                | 0.3                                                      | (0.3)                |
| MH comorbidity                                 |                               |                        |                                |                                       |                      |                                                          |                      |
| Depressive disorder                            | 7.8***                        | 6.0***                 | (0.5)                          | 14.7***                               | (0.8)                | 1.8***                                                   | (0.2)                |
| Conduct disorder/oppositional defiant disorder | 12.3***                       | 12.0***                | (0.5)                          | 17.1***                               | (0.7)                | 1.9***                                                   | (0.2)                |
| Anxiety disorder                               | 8.2***                        | 8.9***                 | (0.6)                          | 14.8***                               | (0.8)                | 1.1***                                                   | (0.2)                |
| Bipolar disorder                               | 7.8***                        | 8.8***                 | (0.6)                          | 13.8***                               | (0.7)                | 1.4***                                                   | (0.2)                |
| Schizophrenia/other psychotic disorder         | 0.7                           | 0.8                    | (1.4)                          | -0.1                                  | (2.0)                | 0.1                                                      | (0.5)                |
| Other MH disorder                              | 8.1***                        | 8.6***                 | (0.3)                          | 15.7***                               | (0.5)                | 2.4***                                                   | (0.2)                |
| County-level characteristics                   |                               |                        |                                |                                       |                      |                                                          |                      |
| Percentage living in urban area <sup>f</sup>   | 0.05                          | 0.2                    | (0.5)                          | 1.7*                                  | (0.7)                | 0.1                                                      | (0.2)                |
| Percentage living in poverty <sup>g</sup>      | 2.0***                        | 2.5***                 | (0.4)                          | 1.1*                                  | (0.5)                | -0.4***                                                  | (0.1)                |
| Outpatient MH facilities per 100K <sup>h</sup> | 0.3                           | 0.5                    | (0.3)                          | 0.4                                   | (0.3)                | -0.1                                                     | (0.1)                |
| Community health centers per 100K <sup>i</sup> | -2.6***                       | -0.5                   | (0.4)                          | -0.6                                  | (0.4)                | -0.1                                                     | (0.1)                |
| Primary care physicians per 100K <sup>j</sup>  | 0.1                           | -0.1                   | (0.4)                          | 0.04                                  | (0.5)                | -0.1                                                     | (0.2)                |
| Psychologists per 100K <sup>k</sup>            | -0.7                          | -1.2                   | (0.5)                          | 0.8                                   | (0.7)                | 0.4                                                      | (0.2)                |
| Intercept                                      |                               |                        |                                | 61.1                                  | 36.6                 |                                                          | 8.6                  |

All MEs were estimated at the reference of race/ethnicity (ie, white youth) and the observed value of other covariates.

<sup>a</sup>  $N = 172\,322$ .

<sup>b</sup>  $N = 62\,263$ .

<sup>c</sup>  $N = 23\,780$ .

<sup>d</sup> Results estimated with logistic regressions that included all covariates listed in the table and state indicators.

<sup>e</sup> Results estimated with zero truncated negative binomial regression model that included all covariates listed in the table and state indicators.

<sup>f</sup> Continuous variable was standardized so that a 1 unit increase corresponds to a 1 SD increase above its mean value.

\*  $P < .05$ .

\*\*  $P < .01$ .

\*\*\*  $P < .001$ .

SUPPLEMENTAL TABLE 7 Regression Results Examining Racial/Ethnic Differences in Treatment Disengagement Among Medicaid-Enrolled Children That Initiated ADHD Medication

|                                                | Discontinued Medication <sup>a</sup> | No Therapy Visit (of Those Who Discontinued) <sup>b</sup> | Discontinued Medication and No Therapy Visit <sup>a</sup> | Less than 4 Therapy Visits (of Those Who Discontinued) <sup>b</sup> | Discontinued Medication and <4 Therapy Visits <sup>a</sup> |
|------------------------------------------------|--------------------------------------|-----------------------------------------------------------|-----------------------------------------------------------|---------------------------------------------------------------------|------------------------------------------------------------|
|                                                | ME (SE) <sup>c</sup>                 | ME (SE) <sup>c</sup>                                      | ME (SE) <sup>c</sup>                                      | ME (SE) <sup>c</sup>                                                | ME (SE) <sup>c</sup>                                       |
| Race/ethnicity                                 |                                      |                                                           |                                                           |                                                                     |                                                            |
| White                                          | (Ref)                                | (Ref)                                                     | (Ref)                                                     | (Ref)                                                               | (Ref)                                                      |
| African American                               | 22.4*** (0.5)                        | -2.6*** (0.7)                                             | 13.1*** (0.6)                                             | -0.4 (0.6)                                                          | 17.7*** (0.6)                                              |
| Hispanic                                       | 16.7*** (0.7)                        | -2.6 (1.4)                                                | 9.4*** (1.1)                                              | -0.8 (0.7)                                                          | 12.9*** (0.7)                                              |
| Other                                          | 12.9*** (1.7)                        | 2.4 (2.4)                                                 | 10.7*** (2.3)                                             | 1.4 (2.3)                                                           | 11.8*** (2.5)                                              |
| Unknown                                        | 10.3*** (0.8)                        | -3.0*** (0.7)                                             | 5.8*** (0.6)                                              | -1.7** (0.6)                                                        | 7.8*** (0.7)                                               |
| Demographics                                   |                                      |                                                           |                                                           |                                                                     |                                                            |
| Age, y                                         | 3.5*** (0.1)                         | -0.4*** (0.1)                                             | 1.9*** (0.1)                                              | -0.4*** (0.1)                                                       | 2.4*** (0.1)                                               |
| Girl (versus boy)                              | 0.8** (0.3)                          | -0.7** (0.3)                                              | -0.1 (0.2)                                                | -0.5* (0.2)                                                         | 0.2 (0.3)                                                  |
| Plan type                                      |                                      |                                                           |                                                           |                                                                     |                                                            |
| Fee-for-service only                           | (Ref)                                | (Ref)                                                     | (Ref)                                                     | (Ref)                                                               | (Ref)                                                      |
| Any behavioral health care carve-out plan      | 2.4 (1.3)                            | 9.5* (4.3)                                                | 6.3** (2.4)                                               | 4.0 (2.3)                                                           | 3.3* (1.5)                                                 |
| Comprehensive managed care plan (no carve-out) | 0.2 (1.1)                            | 0.8 (0.8)                                                 | 0.7 (0.8)                                                 | -1.2 (0.6)                                                          | -0.7 (1.0)                                                 |
| Primary care case management (no carve-out)    | -0.1 (1.0)                           | -3.8** (1.4)                                              | -2.7** (0.8)                                              | -4.1*** (0.7)                                                       | -3.1*** (0.9)                                              |
| More than 1 type of plan                       | 4.2** (1.0)                          | 1.0 (1.0)                                                 | 2.9** (0.7)                                               | -0.7 (0.7)                                                          | 2.4** (0.8)                                                |
| Eligibility type                               |                                      |                                                           |                                                           |                                                                     |                                                            |
| Blind/disabled                                 | (Ref)                                | (Ref)                                                     | (Ref)                                                     | (Ref)                                                               | (Ref)                                                      |
| Foster care                                    | -20.5*** (0.8)                       | -13.1*** (1.0)                                            | -21.3*** (0.9)                                            | -12.8*** (0.8)                                                      | -25.4*** (0.8)                                             |
| Other eligibility type                         | 1.2 (0.6)                            | -1.1 (0.7)                                                | 0.3 (0.7)                                                 | -0.9 (0.5)                                                          | 0.6 (0.6)                                                  |
| Physical health comorbidity                    |                                      |                                                           |                                                           |                                                                     |                                                            |
| Asthma                                         | -0.7* (0.3)                          | 0.01 (0.4)                                                | -0.5 (0.3)                                                | -0.3 (0.3)                                                          | -0.8* (0.3)                                                |
| Any other chronic condition                    | -1.6* (0.7)                          | 3.5*** (0.9)                                              | 1.3 (0.7)                                                 | 2.0** (0.7)                                                         | 0.3 (0.7)                                                  |
| MH comorbidity                                 |                                      |                                                           |                                                           |                                                                     |                                                            |
| Depressive disorder                            | -2.7*** (0.6)                        | -13.2*** (0.7)                                            | -12.7*** (0.7)                                            | -8.0*** (0.5)                                                       | -10.1*** (0.6)                                             |
| Conduct disorder/oppositional defiant disorder | -4.8*** (0.4)                        | -15.9*** (0.6)                                            | -14.2*** (0.6)                                            | -10.3*** (0.5)                                                      | -11.6*** (0.5)                                             |
| Anxiety disorder                               | -4.0*** (0.6)                        | -15.9*** (0.6)                                            | -14.4*** (0.7)                                            | -8.9*** (0.5)                                                       | -10.7*** (0.6)                                             |
| Bipolar disorder                               | -6.1*** (0.6)                        | -11.5*** (0.7)                                            | -13.0*** (0.7)                                            | -6.3*** (0.5)                                                       | -10.6*** (0.6)                                             |
| Schizophrenia/other psychotic disorder         | -2.0 (1.4)                           | -2.4 (1.7)                                                | -4.1* (1.7)                                               | -1.7 (1.1)                                                          | -4.3** (1.5)                                               |
| Other MH disorder                              | -3.7*** (0.3)                        | -13.9*** (0.5)                                            | -11.5*** (0.4)                                            | -9.9*** (0.4)                                                       | -9.8*** (0.3)                                              |
| County-level characteristics                   |                                      |                                                           |                                                           |                                                                     |                                                            |
| Percentage living in urban area <sup>d</sup>   | 0.7* (0.3)                           | -1.8** (0.6)                                              | -0.8 (0.4)                                                | -1.1* (0.5)                                                         | -0.2 (0.4)                                                 |
| Percentage living in poverty <sup>d</sup>      | 2.2*** (0.3)                         | -0.5 (0.5)                                                | 0.8* (0.4)                                                | -0.1 (0.3)                                                          | 1.6*** (0.3)                                               |
| Outpatient MH facilities per 100K <sup>d</sup> | -0.2 (0.2)                           | -0.3 (0.3)                                                | -0.3 (0.2)                                                | -0.2 (0.2)                                                          | -0.3 (0.2)                                                 |
| Community health centers per 100K <sup>d</sup> | 0.5* (0.2)                           | 0.6 (0.4)                                                 | 0.7** (0.3)                                               | 0.5 (0.3)                                                           | 0.6* (0.2)                                                 |
| Primary care physicians per 100K <sup>d</sup>  | -0.03 (0.3)                          | -0.02 (0.6)                                               | 0.2 (0.4)                                                 | 0.003 (0.4)                                                         | 0.1 (0.4)                                                  |
| Psychologists per 100K <sup>d</sup>            | 0.4 (0.4)                            | -0.6 (0.8)                                                | -0.4 (0.6)                                                | -0.6 (0.6)                                                          | -0.4 (0.6)                                                 |
| Intercept                                      | 51.0                                 | 71.9                                                      | 56.4                                                      | 84.3                                                                | 42.7                                                       |

<sup>a</sup> N = 157 449.<sup>b</sup> N = 95 186.<sup>c</sup> Results estimated with logistic regressions that included all covariates listed in the table and state indicators. All MEs were estimated at the reference of race/ethnicity (ie, white youth) and the observed value of other covariates.<sup>d</sup> Continuous variable was standardized so that a 1 unit increase corresponds to a 1 SD increase above its mean value.

\* P &lt; .05.

\*\* P &lt; .01.

\*\*\* P &lt; .001.
